# Supplementary material
Source: bioRxiv or medRxiv preprint supplement (https://www.biorxiv.org/highwire/filestream/33515/field_highwire_adjunct_files/0/084798-1.pdf)
Supplement: Supplementary file [file 084798-1.pdf]

## **Supplementary Materials for:**

### **Cognitive ability and physical health: a Mendelian randomization study**

Saskia P Hagenaars, Catharine R Gale, Ian J Deary and Sarah E Harris

#### Contents

Supplementary Figure 1: Educational attainment and verbal-numerical reasoning in UK

Biobank

Supplementary Table 1: Power calculations

Supplementary Table 2: Observational associations between educational attainment and health outcomes.

Supplementary Table 3a-f: Summary of the SNPs used for instrumental variants previously identified as associated with exposure at genome wide significance

**Supplementary figure 1.** Educational attainment categories and mean scores for verbal-numerical reasoning per group. Error bars represent standard errors.

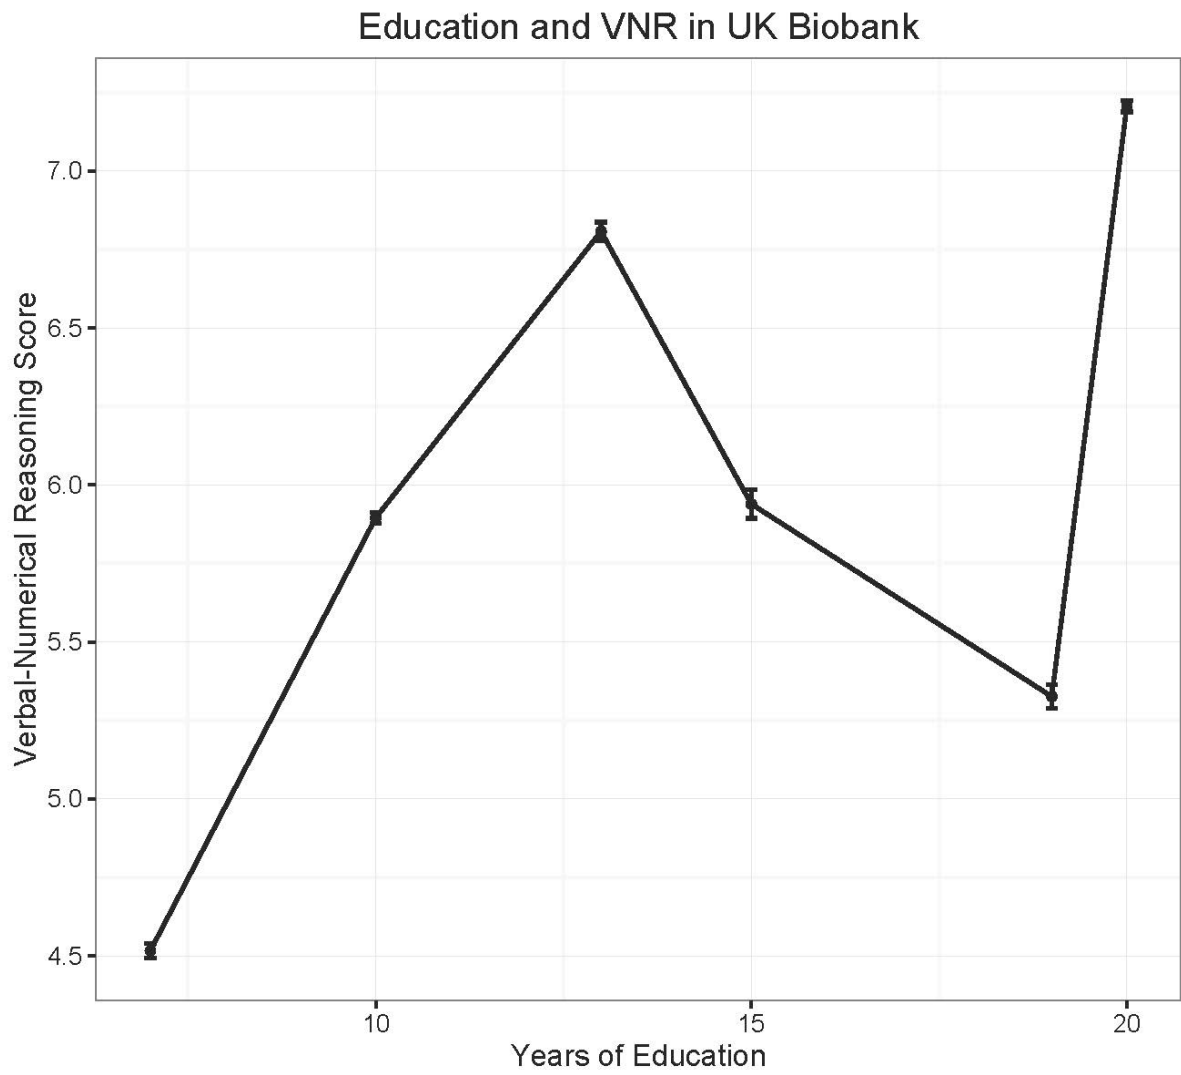

**Supplementary Table 1.** Power for bidirectional Mendelian randomization analysis (two-sided  $\alpha = 0.05$ ). Power calculations are based on the method developed by Brion, et al. <sup>1</sup>.

| Exposure/instrumental variable | Outcome                    | R-squared (of variance in exposure) | Actual N (outcome) | Proportion of cases (outcome) | Observational Effect size | N required for 80% power | Power at actual N |
|--------------------------------|----------------------------|-------------------------------------|--------------------|-------------------------------|---------------------------|--------------------------|-------------------|
| Educational attainment         | BMI                        | 0.015                               | 111712             | NA                            | -0.37                     | 3299                     | 1                 |
| Educational attainment         | Height                     | 0.015                               | 111959             | NA                            | 0.31                      | 4922                     | 1                 |
| Educational attainment         | Systolic blood pressure    | 0.015                               | 106759             | NA                            | -0.2                      | 12559                    | 1                 |
| Educational attainment         | Coronary artery disease    | 0.015                               | 110,072            | 0.048                         | OR 0.4                    | 42,832                   | 1                 |
| Educational attainment         | Type 2 diabetes            | 0.015                               | 111,779            | 0.034                         | OR 0.6                    | 86,084                   | 0.89              |
| BMI                            | Verbal-numerical reasoning | 0.027                               | 36,035             | NA                            | -0.05                     | 115990                   | 0.35              |
| Height                         | Verbal-numerical reasoning | 0.15                                | 36,035             | NA                            | 0.18                      | 1563                     | 1                 |
| Systolic blood pressure        | Verbal-numerical reasoning | 0.009                               | 36,035             | NA                            | -0.05                     | 347968                   | 0.15              |
| Coronary artery disease        | Verbal-numerical reasoning | 0.1                                 | 36,035             | NA                            | -0.27                     | 999                      | 1                 |
| Type 2 diabetes                | Verbal-numerical reasoning | 0.057                               | 36,035             | NA                            | -0.06                     | 36207                    | 0.8               |

**Supplementary Table 2.** Observational associations between educational attainment and health outcomes.

|                         | Educational attainment – health outcomes (7 vs 10 years) |                   |                               | Educational attainment – health outcomes (7 vs 13 years) |                   |                               |
|-------------------------|----------------------------------------------------------|-------------------|-------------------------------|----------------------------------------------------------|-------------------|-------------------------------|
|                         | Beta                                                     | 95% CI            | p                             | Beta                                                     | 95% CI            | p                             |
| BMI                     | -0.1287                                                  | -0.146 – (-0.111) | <b>7.25×10<sup>-44</sup></b>  | -0.2350                                                  | -0.257 – (-0.213) | <b>8.15×10<sup>-93</sup></b>  |
| Height                  | 0.1667                                                   | 0.155 – 0.178     | <b>2.25×10<sup>-151</sup></b> | 0.2590                                                   | 0.243 – 0.275     | <b>1.94×10<sup>-235</sup></b> |
| Systolic blood pressure | -0.0775                                                  | -0.095 – (-0.060) | <b>6.89×10<sup>-18</sup></b>  | -0.1273                                                  | -0.149 – (-0.106) | <b>1.71×10<sup>-30</sup></b>  |
| Type 2 diabetes         | OR: 0.815                                                | 0.742 – 0.895     | <b>1.74×10<sup>-05</sup></b>  | OR: 0.800                                                | 0.706 – 0.905     | <b>4.27×10<sup>-04</sup></b>  |
| Coronary artery disease | OR: 0.631                                                | 0.583 – 0.683     | <b>2.79×10<sup>-30</sup></b>  | OR: 0.555                                                | 0.496 – 0.620     | <b>2.98×10<sup>-25</sup></b>  |

**Supplementary Table 3a-f.** Summary of the SNPs used for instrumental variants previously identified as associated with exposure at genome wide significance.

See attached Excel spreadsheet

## References

- 1 Brion, M.-J. A., Shakhbazov, K. & Visscher, P. M. Calculating statistical power in Mendelian randomization studies. *International Journal of Epidemiology* **42**, 1497-1501, doi:10.1093/ije/dyt179 (2013).
